# Supplementary material for: RETRACTED ARTICLE: PI3K/Akt pathway and Nanog maintain cancer stem cells in sarcomas
Source: PubMed Central journal article supplement (PMC7815726; doi:10.1038/s41389-020-00300-z), 2021-01-19

# Supplementary Figure S1

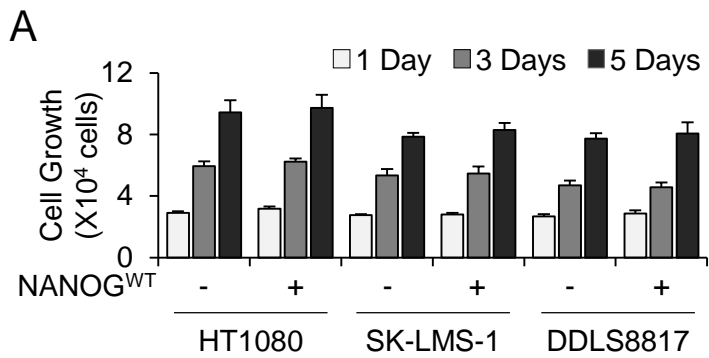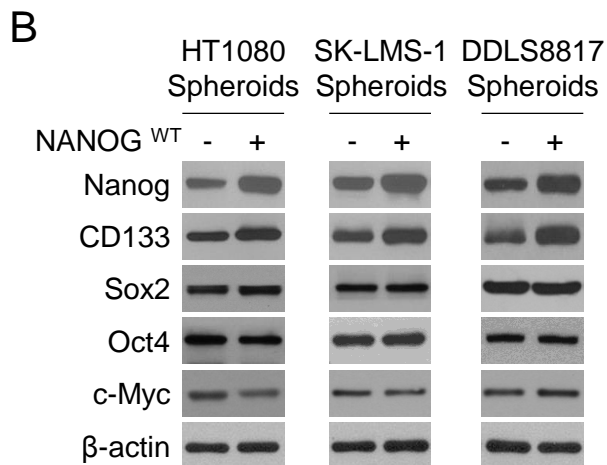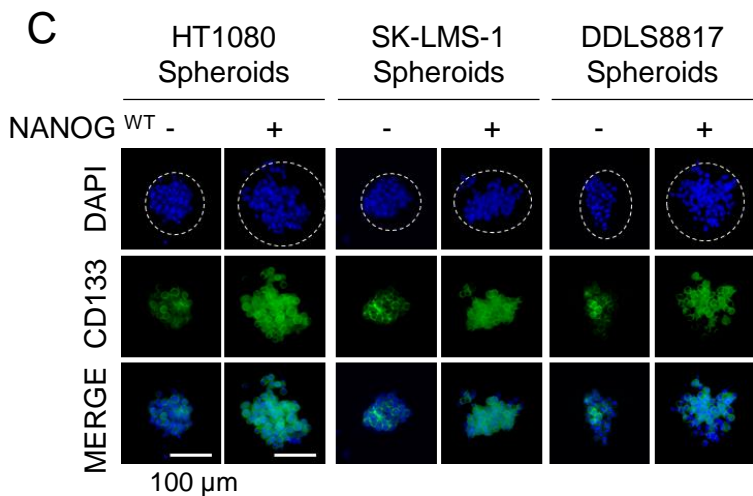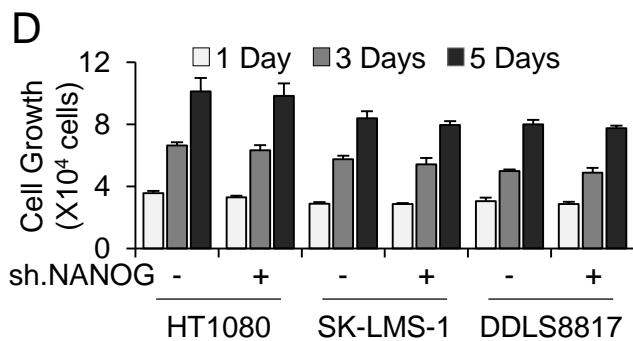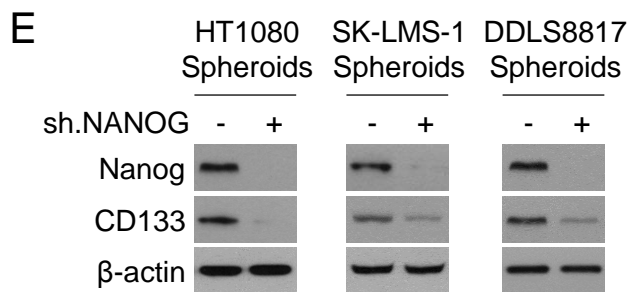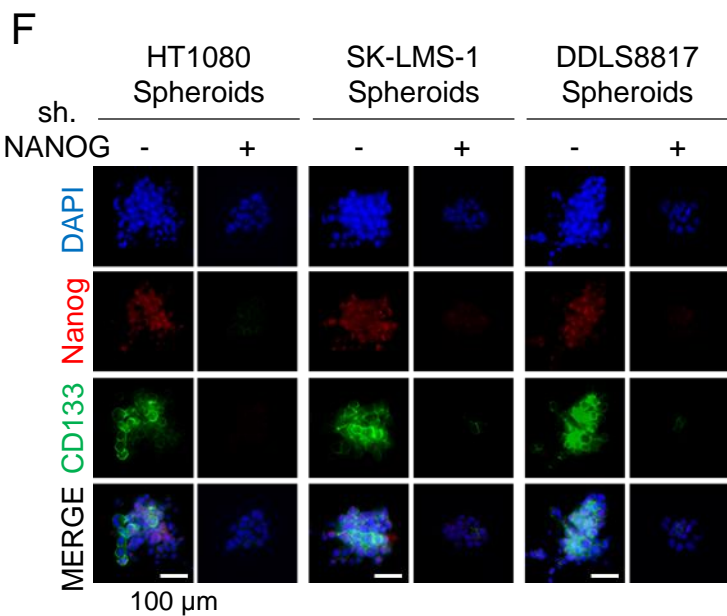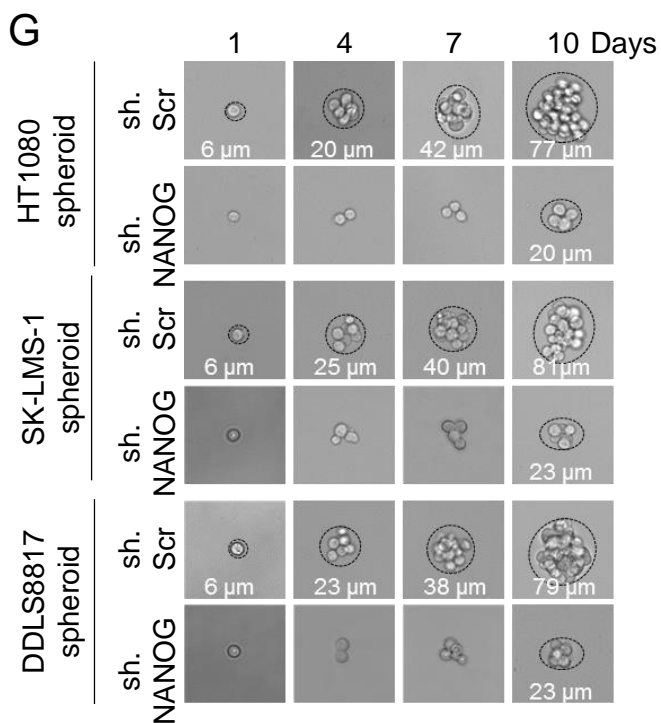

# Supplementary Figure S1

H

CD133

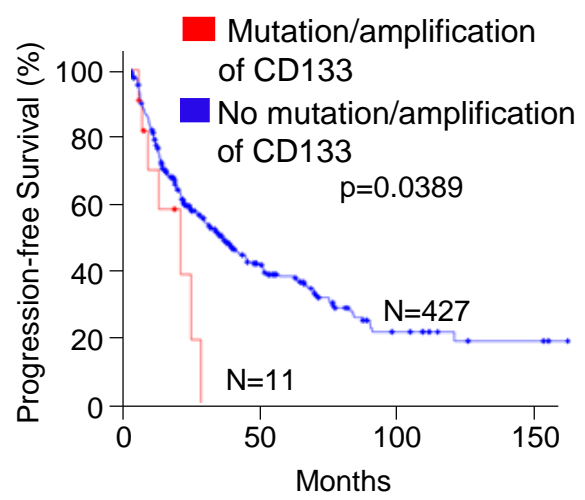

NANOG

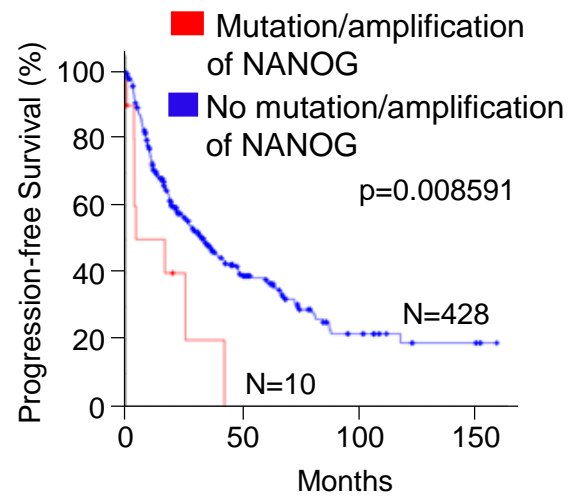

# Supplementary Figure S2

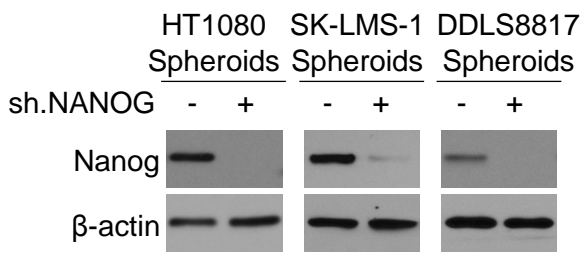

# Supplementary Figure S3

**A**

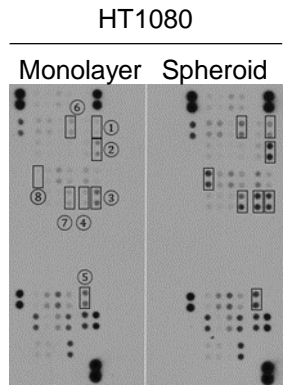

**B**

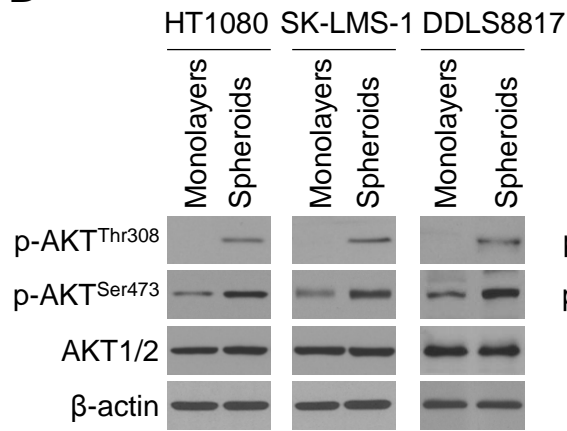

**C**

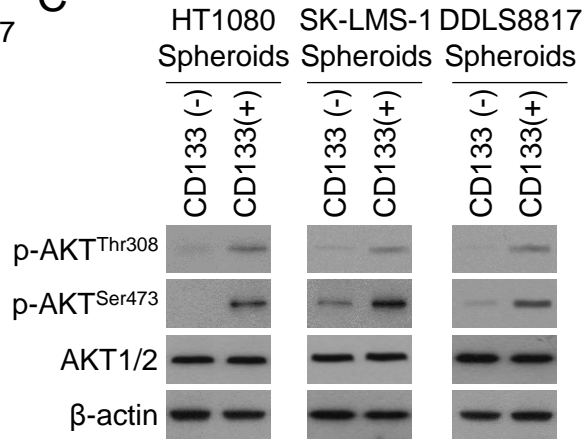

**D**

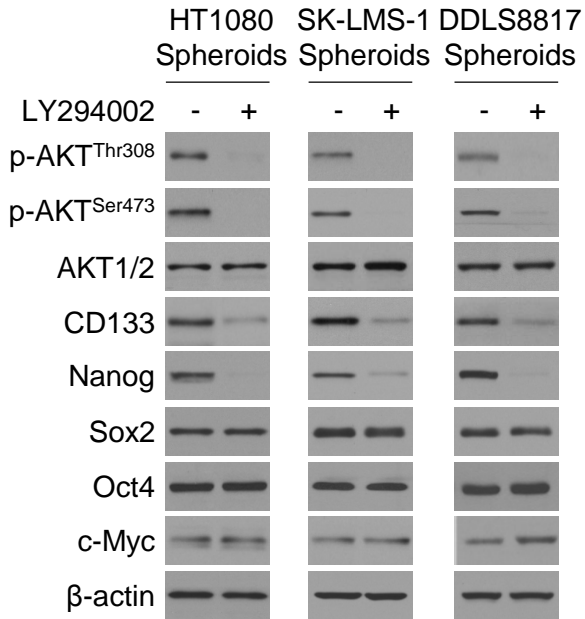

**E**

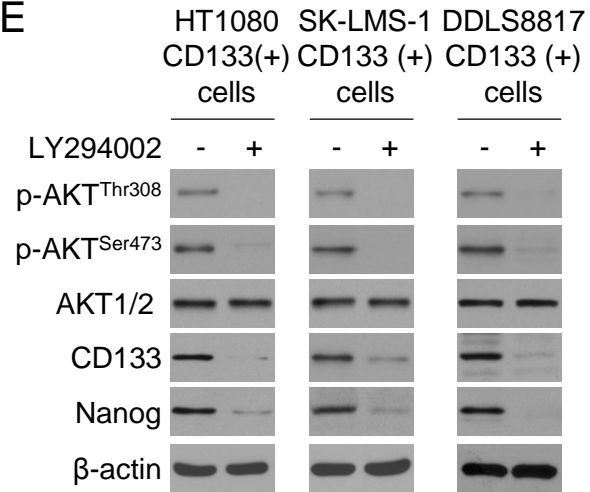

**F**

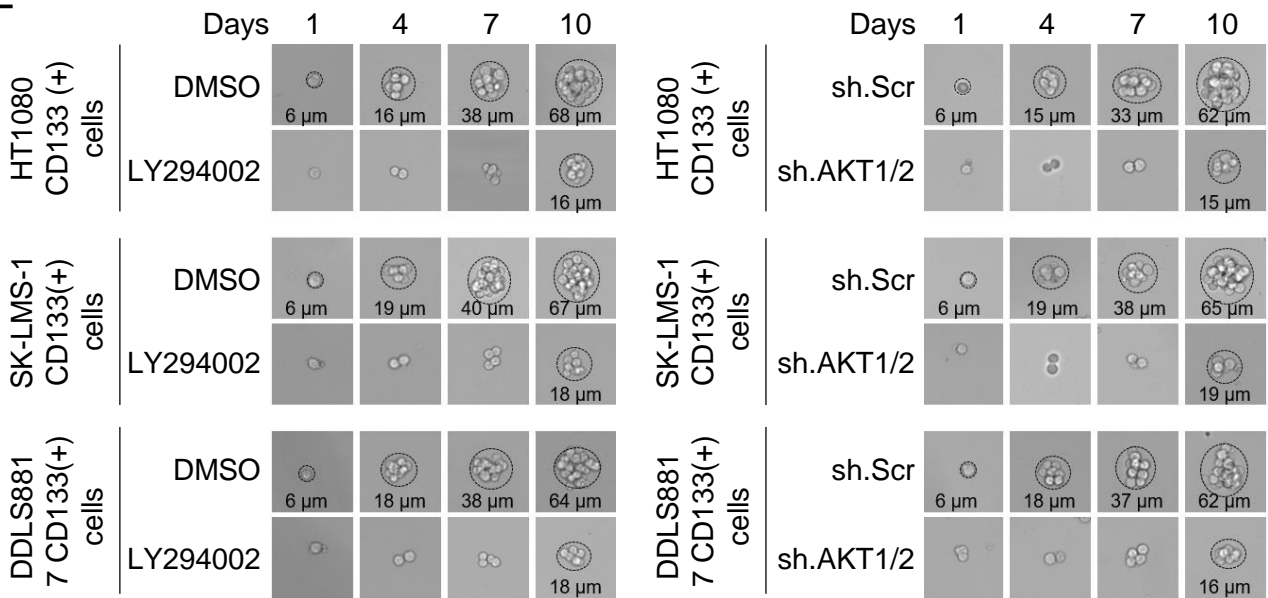

# Supplementary Figure S4

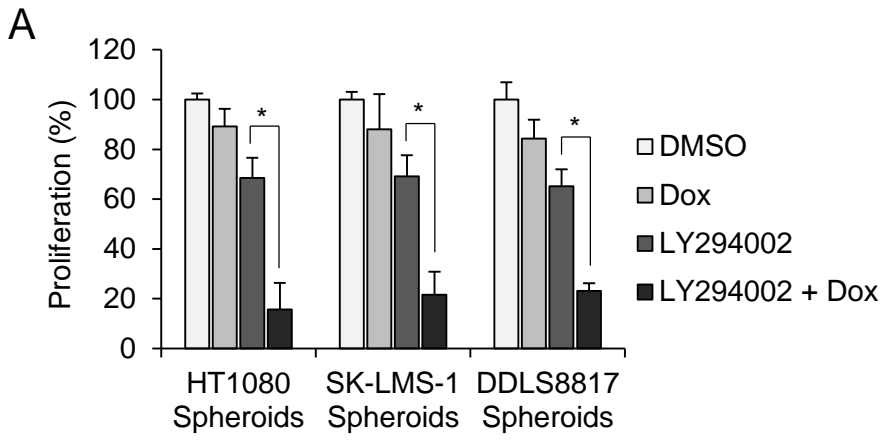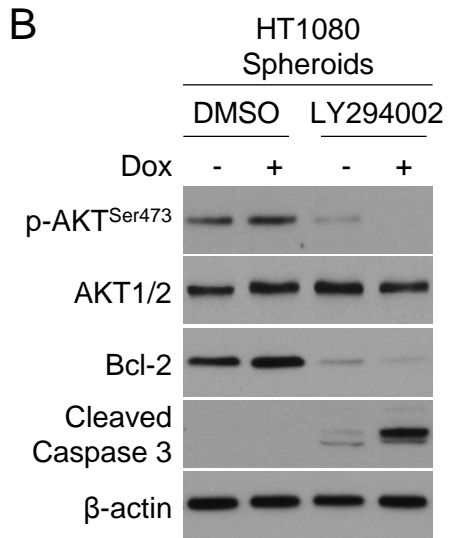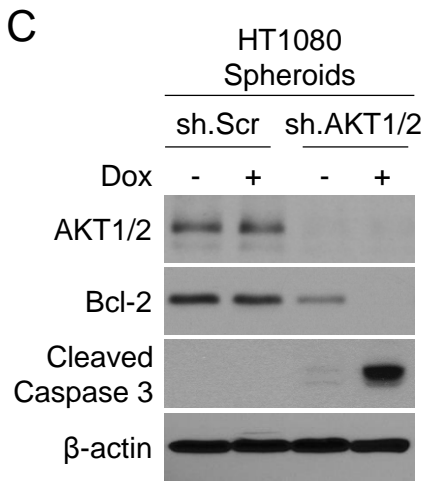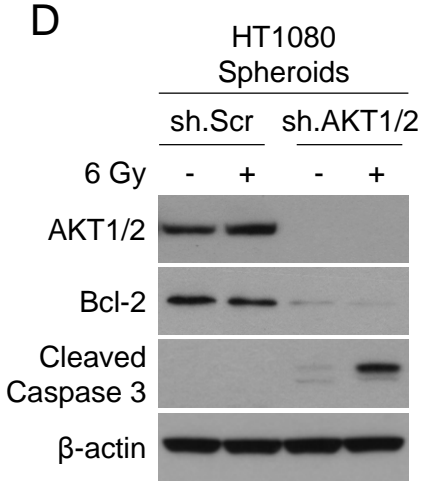

# Supplementary Figure S5

A

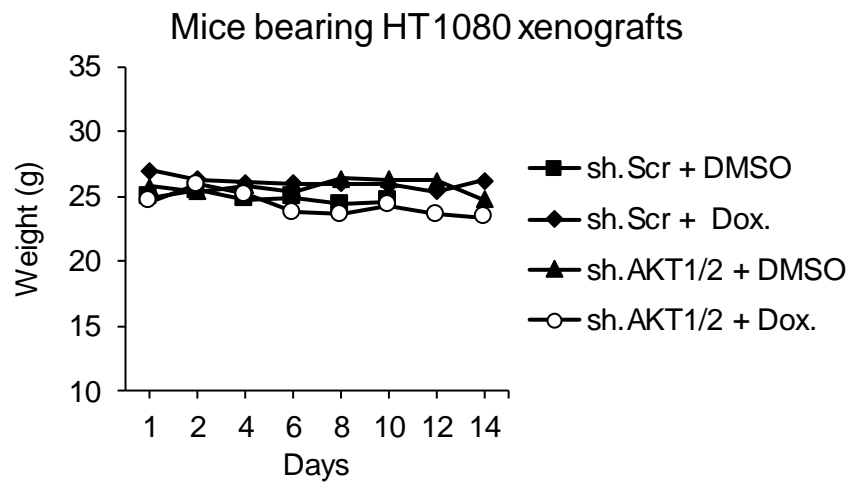

Supplement: 41389_2020_300_MOESM2_ESM.pdf [file 41389_2020_300_MOESM2_ESM.pdf]
